# Supplementary material
Source: publisher site journal article supplement (https://www.dovepress.com/get_supplementary_file.php?f=459510.xlsx)
Supplement: Supplementary file 1 [file get_supplementary_file.php]

## Sheet: Sheet1
			IC50 of different cancer cell(μM)
No	Structural formula	Molecular weight	HGC-27	Bel-7402	MHCC-LM9	Huh-7	HT-29	HepG-2	SW480	LOVO	RKO	SGC-7901	DU-145	PC-3	NCl-H460	HCT-15	SF-268	Caco-2	HL-60	MGC-803	GES-1	HDAC1	BGC-803	BGC-823	BEL-7402	A549	MDA-MB-435	HCT116	MCF-7	H1299	H460	H226B	H446	H1688	K562	PC-3	MV3	BEL7404	SK-Hep-1	SW579	HUVEC	H1299/CsR	H1299/PmR	H460/PcR	H226B/PcR
1	C19H17N3O2	319.36																								＜0.003	＜0.003	＜0.003		0.48±0.19	0.14±0.08	0.16±0.07										0.13±0.05	0.29±0.07	0.23±0.11	0.17±0.01
2	C19H18N3O5P	399.34																								2.6±0.34		0.066±0.009	0.65±0.059
3	C19H18N4O	318.37																															5.4	1.14
4	C26H20ClN3O2	441.91																								0.86±0.044	0.049±0.003	2.6±0.083
5	C36H37N3O4S3	684.74		48.94±2.40								＞50						2.02±0.04	0.58±0.02										44.82±3.64
6	C34H36N5O6S+	642.61																						0.07±0.01	2.10±0.15	2.31±0.21
7	C24H27N3O2	389.49											2	1	1.5	1	1.2												1
8	C24H25N3O3	403.47
9	C33H28N6O3	556.61																				0.16±0.015				0.008±0.001		＜0.003	0.018±0.002
10	C33H28N6O3	556.61																				0.022±0.002				0.005±0.001		＜0.003	0.017±0.002
11	C21H21N3O	331.41	0.81±0.04						0.71±0.01	0.23±0.02	0.20±0.01	0.09±0.002								0.09±0.005	0.13±0.01
12	C24H18FN3O	383.42	3.10±0.02				0.37±0.02	4.01±0.42													9.11±0.74					＞18			7.87±0.12
13	C19H16FN3O	321.35																								＜0.003	＜0.003	＜0.003
14	C19H16ClN3O	337.8																								＜0.003	＜0.003	＜0.003
15	C28H28N6O	464.56																								6.8	2.78	5.94
16	C19H16FN3O2	337.35																								＜0.003	＜0.003	＜0.003
17	C19H16ClN3O2	353.8																								0.12±0.005	0.005±0.000	0.005±0.000
18	C19H17N3O3	335.36																								0.75±0.04	0.003±0.000	0.007±0.000
19	C20H19N3O3	349.38																								1.6±0.08	0.66±0.04	0.07±0.001
20	C19H17N3O3	335.36																								0.23±0.02	0.013±0.001	0.009±0.000
21	C25H21N3O	379.45			0.24±0.05	0.44±0.12		0.92±0.20
22	C29H26N2O7	514.53	3.3±1.5	28.1±1.3																						8.5±2.1		80.8±2.3	72.3±1.5
23	C26H22FN3O	411.47	0.49±0.04									0.24±0.01								0.44±0.003	＞18
24	C24H17F2N3O2	417.41	0.85±0.05									0.13±0.05								0.16±0.01
25	C26H19F2N3O3	459.44	0.56±0.03									0.27±0.01								0.22±0.02
26	C18H14N2O2S	322.38																								0.05±0.004	＜0.003	0.04 ± 0.05
27	C18H13FN2O2S	340.37																								1.2±0.11	＜0.003	＜0.003
28	C18H13ClN2O2S	356.83																								0.02±0.001	＜0.003	＜0.003
29	C19H16N2O3S	352.41																								0.3±0.02	＜0.003	＜0.003
30	C18H14N2O3S	338.38																								0.7±0.08	＜0.003	＜0.003
31	C20H18FN3O2	351.37																																	＜0.003	0.3	0.4	0.1	1.3	6.1
32	C27H24Cl2N2O2	479.4																								0.76±0.04	0.16±0.03	0.16±0.01
33	C43H36F2N6O6	770.73																								0.73±0.12		0.032±0.007	0.20±0.02												0.58±0.15
34	C25H31N3O2	405.53							2.84±0.11														2.53±0.12

## Sheet: Sheet2
	Tumor Type	Cell or animal model	Mechanism	Pathway	Refs
	liver cancer	HepG2 cells; A human hepatoma xenograft model	c-myc was the key molecule	/	4
		SMMC-7721 and HepG2 Cells	inhibiting NOD1 to suppress NF-κB and MAPK activation	NOD1 signal pathway	5
		HCC, Hepa1-6 and HepG2 cell; Hepa1-6 hepatoma-bearing mice	inhibits both Mus musculus and Homo sapiens HCC, Hepa1-6 and HepG2 cell proliferation	WWOX-dependent pathway	6
		HepG2, SMMC-7721 and H22 cell; H22 xenograft mouse model	decreased p-Akt levels activated by SC79, which led to the increase of bax/bcl-2 and cleaved-caspase3.	PI3K/Akt pathway	7
		Hep3B and Huh-7 cells	reduced both the Yes-associated protein（YAP） level and cell growth of HCC; mitochondria dysfunction-mediated apoptosis	/	8
		HCC cell lines	inhibit cell proliferation and induce apoptosis in HCC cells under hypoxia, and inhibit HIF-1α induced by hypoxia in HCC cells	PI3K/AKT/mTOR pathway	10
	lung cancer	A549 human lung cancer cells	induction of G2/M phase cell cycle arrest and apoptosis, and down-regulation of ERK in human lung cancer cells.	intrinsic apoptotic pathway	11
		human SCLC cell lines NCI-H446 and NCI-H1688	induced cell cycle arrest at G2/M phase, induced apoptosis by up-regulating the expression of caspase-12 and cytochrome C protein, and induced the expression of Bax mRNA and by down-regulating of the expression of Bcl-2 mRNA	intrinsic caspase-dependent pathways	12
		A549 and NCI-H522 lung cancer cells	induced DNA damage and arrested the cell cycle at the G2/M phase; inhibit cell invasion was mediated by altering the expression of E-cadherin, ZO-1, N-cadherin, and Vimentin	SOX9-β–catenin signaling pathway	14
		A549 and H1299 cells	involving higher expression of DR5 and cytochrome-c release with dissipation of mitochondrial membrane potential	both extrinsic and intrinsic pathways	15
		Lewis lung carcinoma	suppressed HGF-stimulated invasion and migration of tumor cells through inhibition of cell spreadin	/	16
		NSCLC A549 and LLC cells; LLC tumor-bearing mouse model	up-regulated the expression of apoptosis-related genes and proteins and increased activation of the endoplasmic reticulum stress (ERS) pathway	ERS pathway	17
		A549 and H1299 cells	induced G2/M cell cycle arrest; prevented the γ-secretase cleavage of Notch3 at the cell surface and hence inhibited Notch3 activation	Notch3 signaling pathway	18, 19
		H1650, H1975 and NSCLC cells	elevating of CD8+ T cells and downregulating of the MUC1-C/PD-L1 axis	/	20
		CL1 cells and human umbilical vein endothelial cells (HUVECs)	inhibited theexpression of vascular endothelial growth factor (VEGF) and the p44/p42 mitogen-activated protein kinase (MAPK, ERK) that correlated with endothelial cells angiogenesis	p38MAPK, MAPK，ERK	21
	Gastric cancer	Gastric cancer stem cells	alterations in the sphere formation ability, the expression of induced‑pluripotent stem cell factors, expression of epithelial-to-mesenchymal transition (EMT) factors	Wnt/β‑catenin signaling pathway	24
		SGC-7901 cells	downregulation of survivin and upregulation of caspase-3 mRNA.	/	25
		SGC-7901 cells	inhibiting the cell cycle at G2/M phase, activating caspase-3, -8 and -9, and altering the expression of caspase-3, Bax and Bcl-2.		26
		SGC-7901 cells	mitotic arrest and subsequent mitotic slippage		27
		BGC-823 cells; BGC-823 cell-derived xenograft models	induced cell cycle arrest in G2/M phase; decreased the expression of Bcl‑2, phosphorylated Akt and Her‑2, increased the expression of Bax	Her‑2/AKT/Bcl-2 signaling pathway	28
		SGC-7901 cells	inhibit the protein expressions of mTOR and p-mTOR	mTOR signal pathway	29
		freshly-removed gastric tumor tissues	reducing the mRNA expression levels of excision repair cross-complementing 1(ERCC1) and thymidylate synthase(TS)	DNA repair pathway	30
	intestinal cancer	bulk cultured cancer cells (BCC) of colon cancers	induce apoptosis of the cells captured in G2/M phase; decreased the CD133 and SCD1 gene expression	WNT and NOTCH signaling pathway	32
		HCT-116 Human Colorectal Cancer Cells	accumulation of cells in S and G2/M phases; downregulate MMP3 and PGI expression	JAK2/STAT3 pathway; p53 signaling pathway	33
		HT-29 and HCT-116 CRC cells; HCT-116 cell xenograft models	suppresses the migration and invasion of CRC cells by inhibiting the acetyl-NF-κB p65 by Sirt1, and suppression of metalloproteinase-9 expression	Sirt1 signaling pathway	34
		SW480 colon cancer cells	upregulation of caspase-3 and Bax and suppression of Bcl-2; enhancing the expression of LC3 II and Beclin 1		35
		LoVo cells; LoVo cells xenograft models	downregulating HIF-1α expression	PI3K/Akt signaling pathway	36
		SW480 colon cancer cells; C57BL/6 colorectal cancer mice	caused G2/M‑phase arrestand suppressed the translocation of phosphorylated‑NF‑κB from the cytoplasm into the nucleus; Reduce the levels of inflammatory factors	NF-кB signaling pathway	37
	pancreatic cancer	PANC‑1 and SW1990 PC cell; orthotopic pancreatic tumor model	inhibiting phosphoinositide 3‑kinase/AKT and mitogen‑activated protein kinase/ERK, and inhibiting the phosphorylation of signal transducer and activator of transcription activator 3	PI3K/Akt and MAPK/ERK signaling pathways	38
	thyroid carcinoma	TPC-1 and SW1736 human thyroid carcinoma cells	increased the protein levels of γH2AX and cleaved PARP, and ROS production	PI3K/Akt signaling pathway	39
	kidney cancer	786-O, Caki-1 and HK-2 cells	arrest cells in the G2/M phase, and regulate the expression of apoptosis- and cell cycle-related genes	MAPK and NF-кB signalling pathway.	40
	human urothelial cell carcinoma	5637 and HT1197 cells	caused G2/M cell-cycle arrest and induced caspase-dependent apoptosis in UCC cells.	MAPK signaling pathways	41
	bladder cancer	253J and T24 cells	induces apoptosis and enhances TRAIL-induced apoptosis possibly through mTOR/S6K1-mediated downregulation of Mcl-1	mTOR/S6K1 pathway	42
	Ovarian cancer	HO-8910PM cells	inhibit the growth of ovarian cancer cells by G2/M arrest and intrinsic and extrinsic apoptosis	PI3K/Akt, ERK1/2 MAPK, and p38 MAPK signaling pathway	43
	cervical carcinoma	HeLa cell	G2/M transition by inductions of ROS/NO generations	Ras-Raf-JNK and PTK pathway	44
	oral cancer	MC3 and HSC4 cells	cleavages of PARP (poly (ADP-ribose) polymerase) and caspase-3; increased the level of Bax protein	AKT pathway	45
	Nasopharyngeal carcinoma	HONE1 and CNE1 cells	decreased mRNA and protein levels of MMP-2 and its activity; inhibited the translocation of NF-κB p65	MAKP and Akt signaling pathways	46
	tongue cancer	CAL-27 cell	upregulated the expression levels of SOCS2, DUSP1, and NRAS, downregulated STAT2, MMP1, and FGFR3	Toll‐like receptor (TLR), IL‐6 signaling pathway, et al.	47
	melanoma	A375-S2 cell	led to IkappaBalpha phosphorylation and degradation that reflect translocation of NF-kappaB	PI3K/Akt/caspase and Fas-L/NF-kappaB signaling pathways	48
	cholangiocarcinoma	HuCCT-1 and TFK-1 cells; TFK-1 cell xenograft models	upregulation of phosphatase shatterproof 2 (SHP-2), a negative feedback regulator of IL-6/STAT3	IL-6/STAT3 signaling pathway	49
	breast cancer	MCF7 and MDAMB 231	selectively activated p53 and p21 and decreased inactive Rb, the master molecules in G1/S checkpoint	p53-p21-Rb pathway	51
	ovarian cancer	A2780、A2780CP、ES-2 and SKOV-3 cells	increases in the percentage of apoptotic cells, DNA ladders, and cleavage of caspase 3 and poly(ADP ribose) polymerase (PARP) proteins	PERK pathway	52
	prostate cancer	LNCaP and 22Rv1 cell;	targeted Src and reduced DHT-induced Src activation	/	53
	Esophageal cancer	EC1, Eca109 and Kyse150 cells; Eca109 and Kyse150 cells xenograft model	induced M-phase cell-cycle arrest by inactivation of CUL4A E3 ligase, which mediates degradation blockage of p53 and transcriptional activation of p21	p53/p21 signaling pathway	54
	oral squamous cell carcinoma	A-253, HSC-4, CAL-27, SCC-4 and HUVEC cell lines; HSC-4 cell xenograft model	reduce the activity of RAGE pathway by affecting the binding between HMBG1 and RAGE	HMGB1/RAGE signaling pathway	55
